# Supplementary figures and images for: HSP90α Mediates Sorafenib Resistance in Human Hepatocellular Carcinoma by Necroptosis Inhibition under Hypoxia
Source: MDPI journal article supplement (doi:10.3390/cancers13020243), 2021-01-11

Figure 5

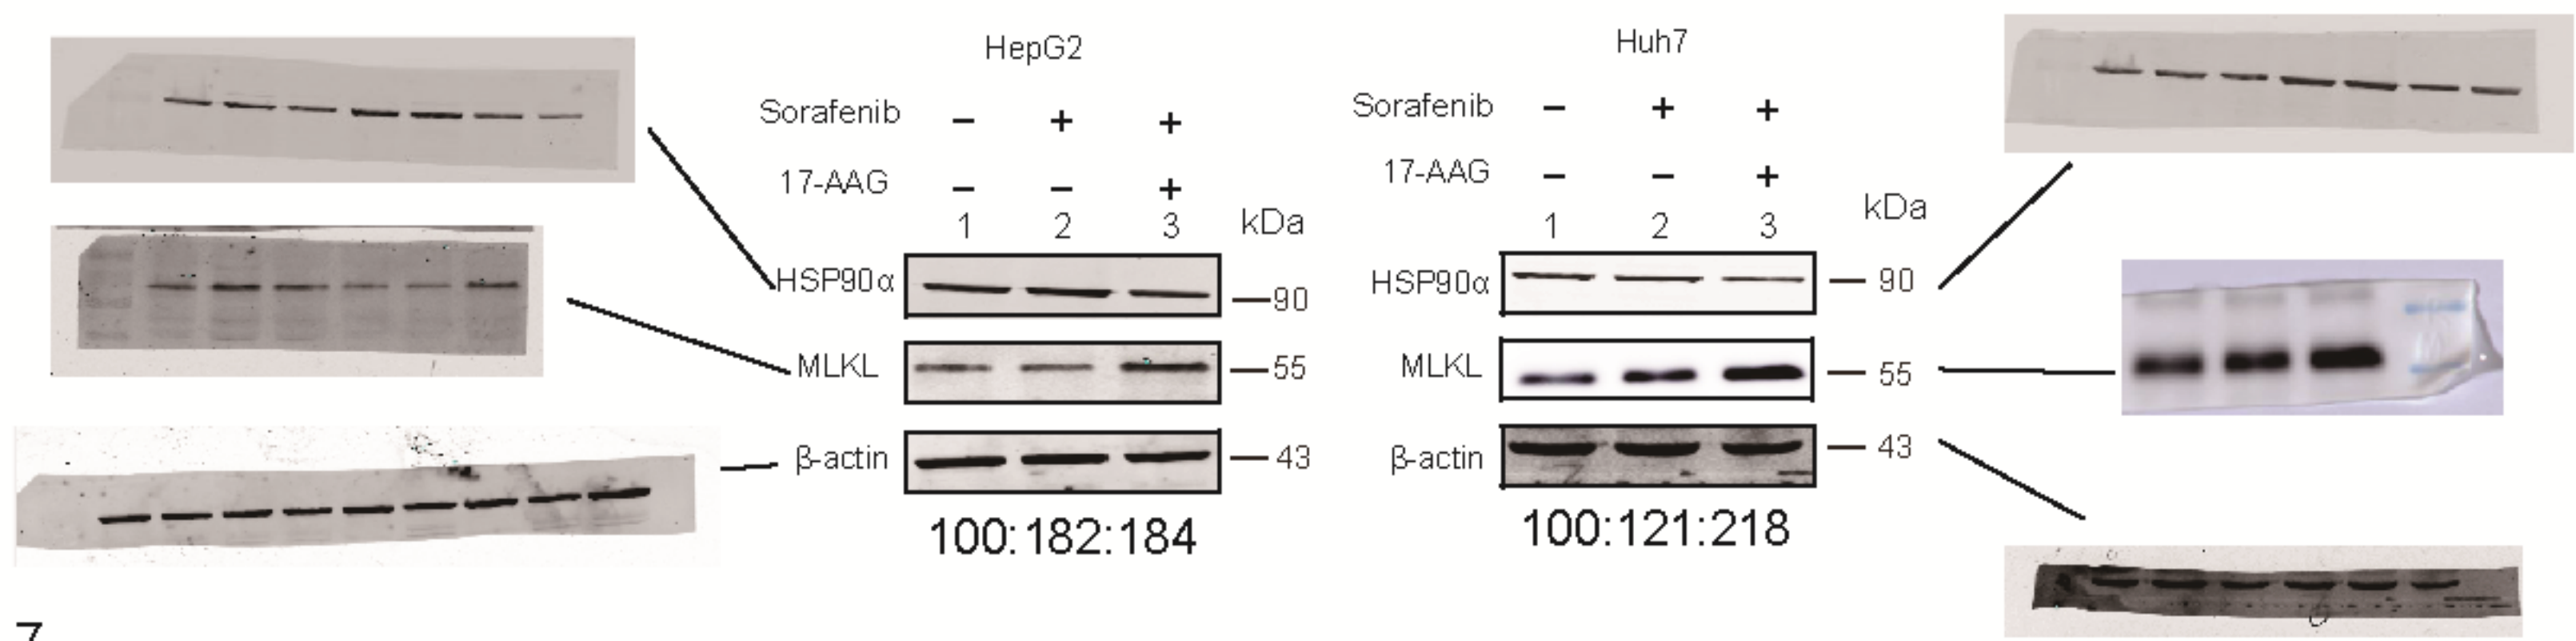

Figure 7

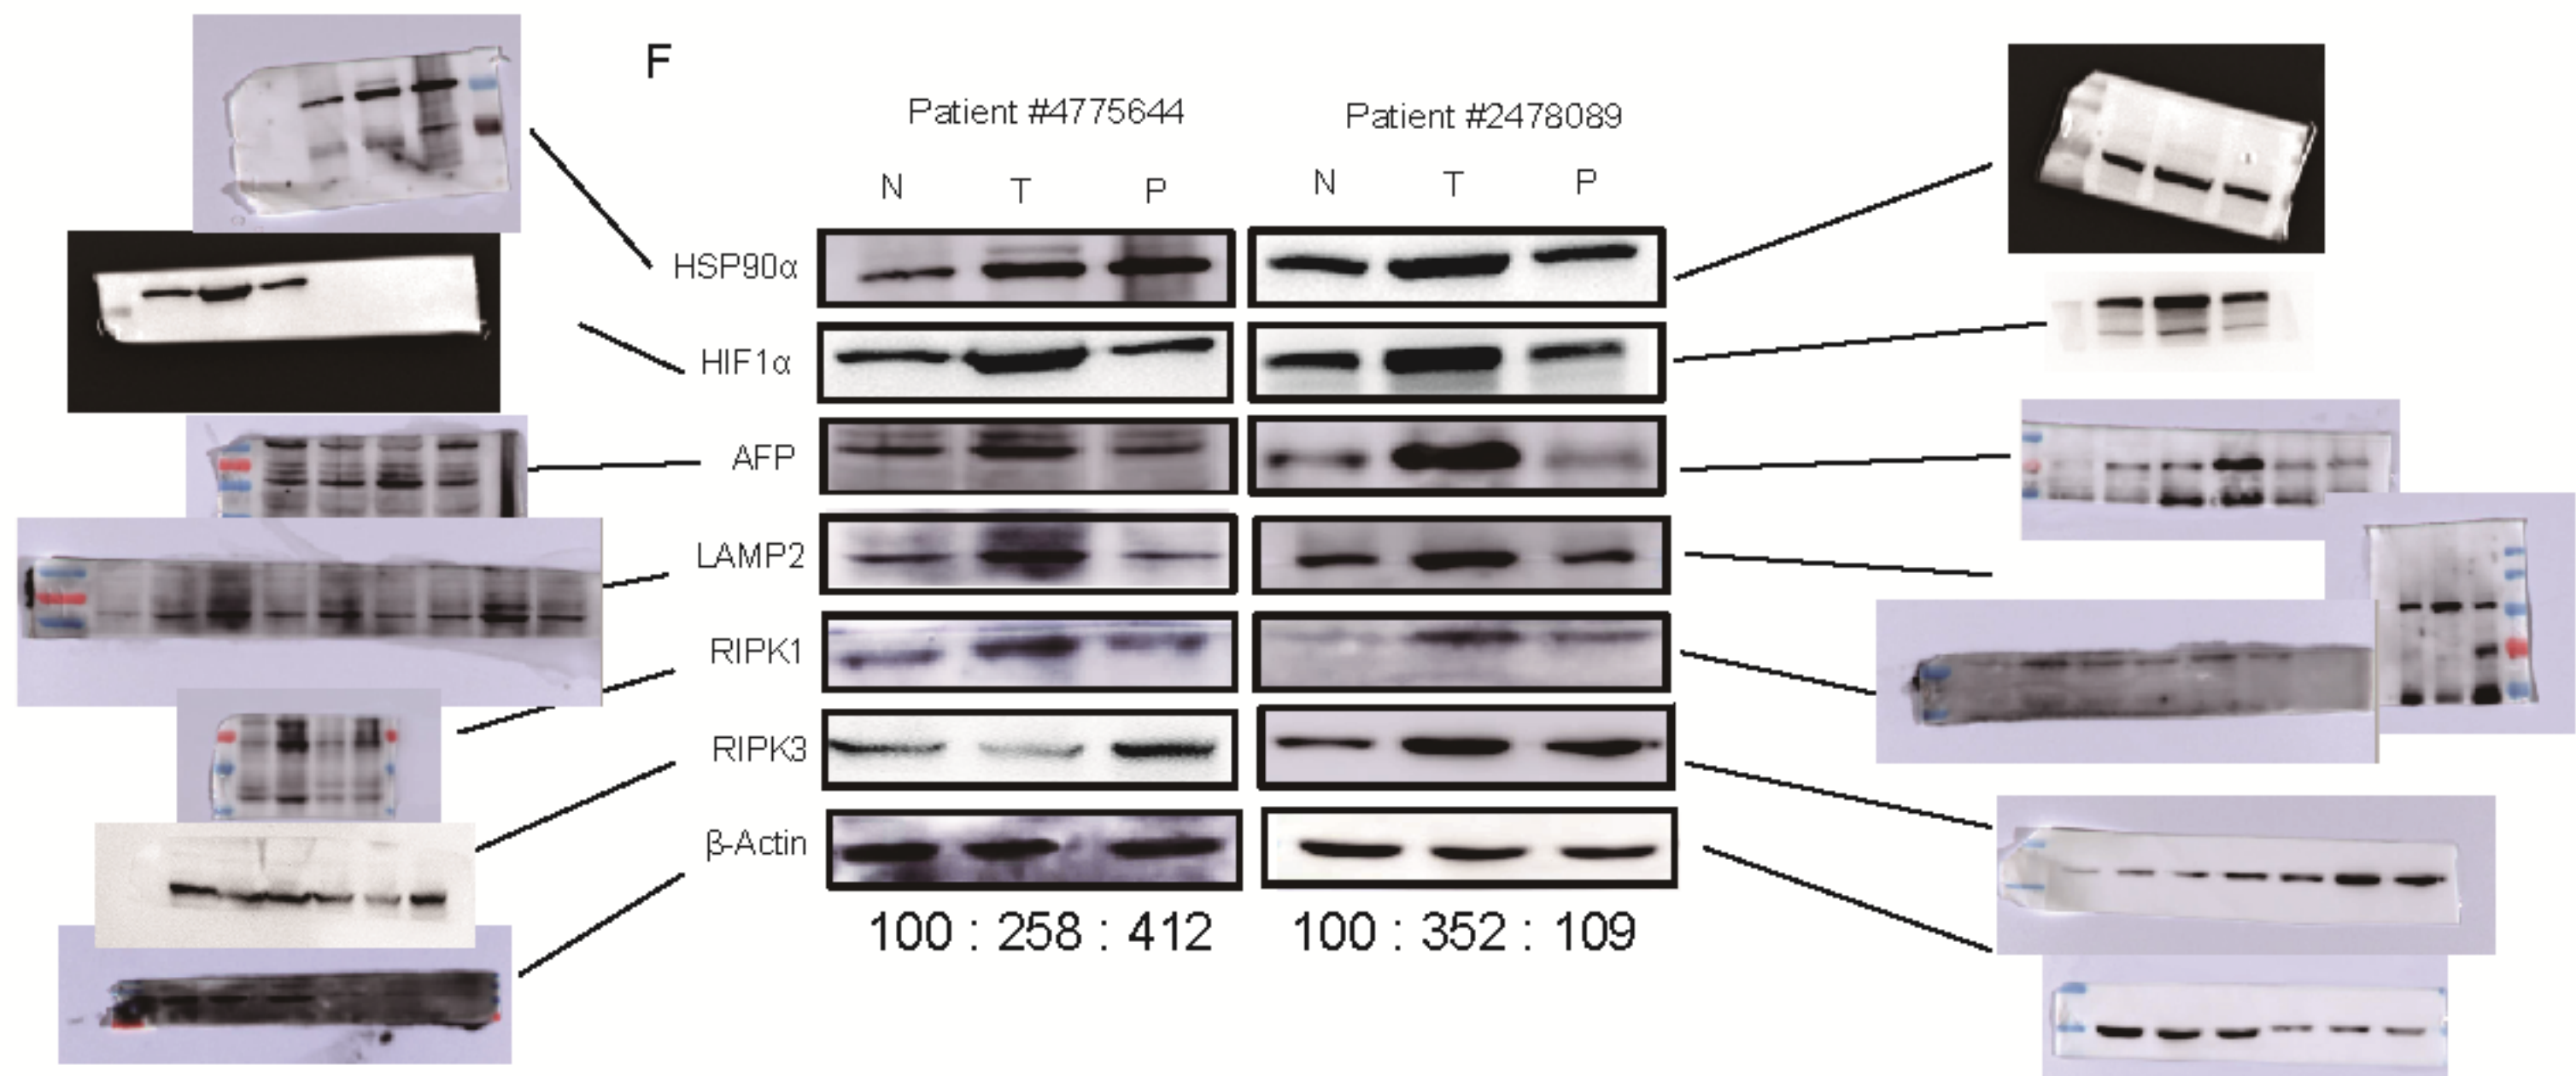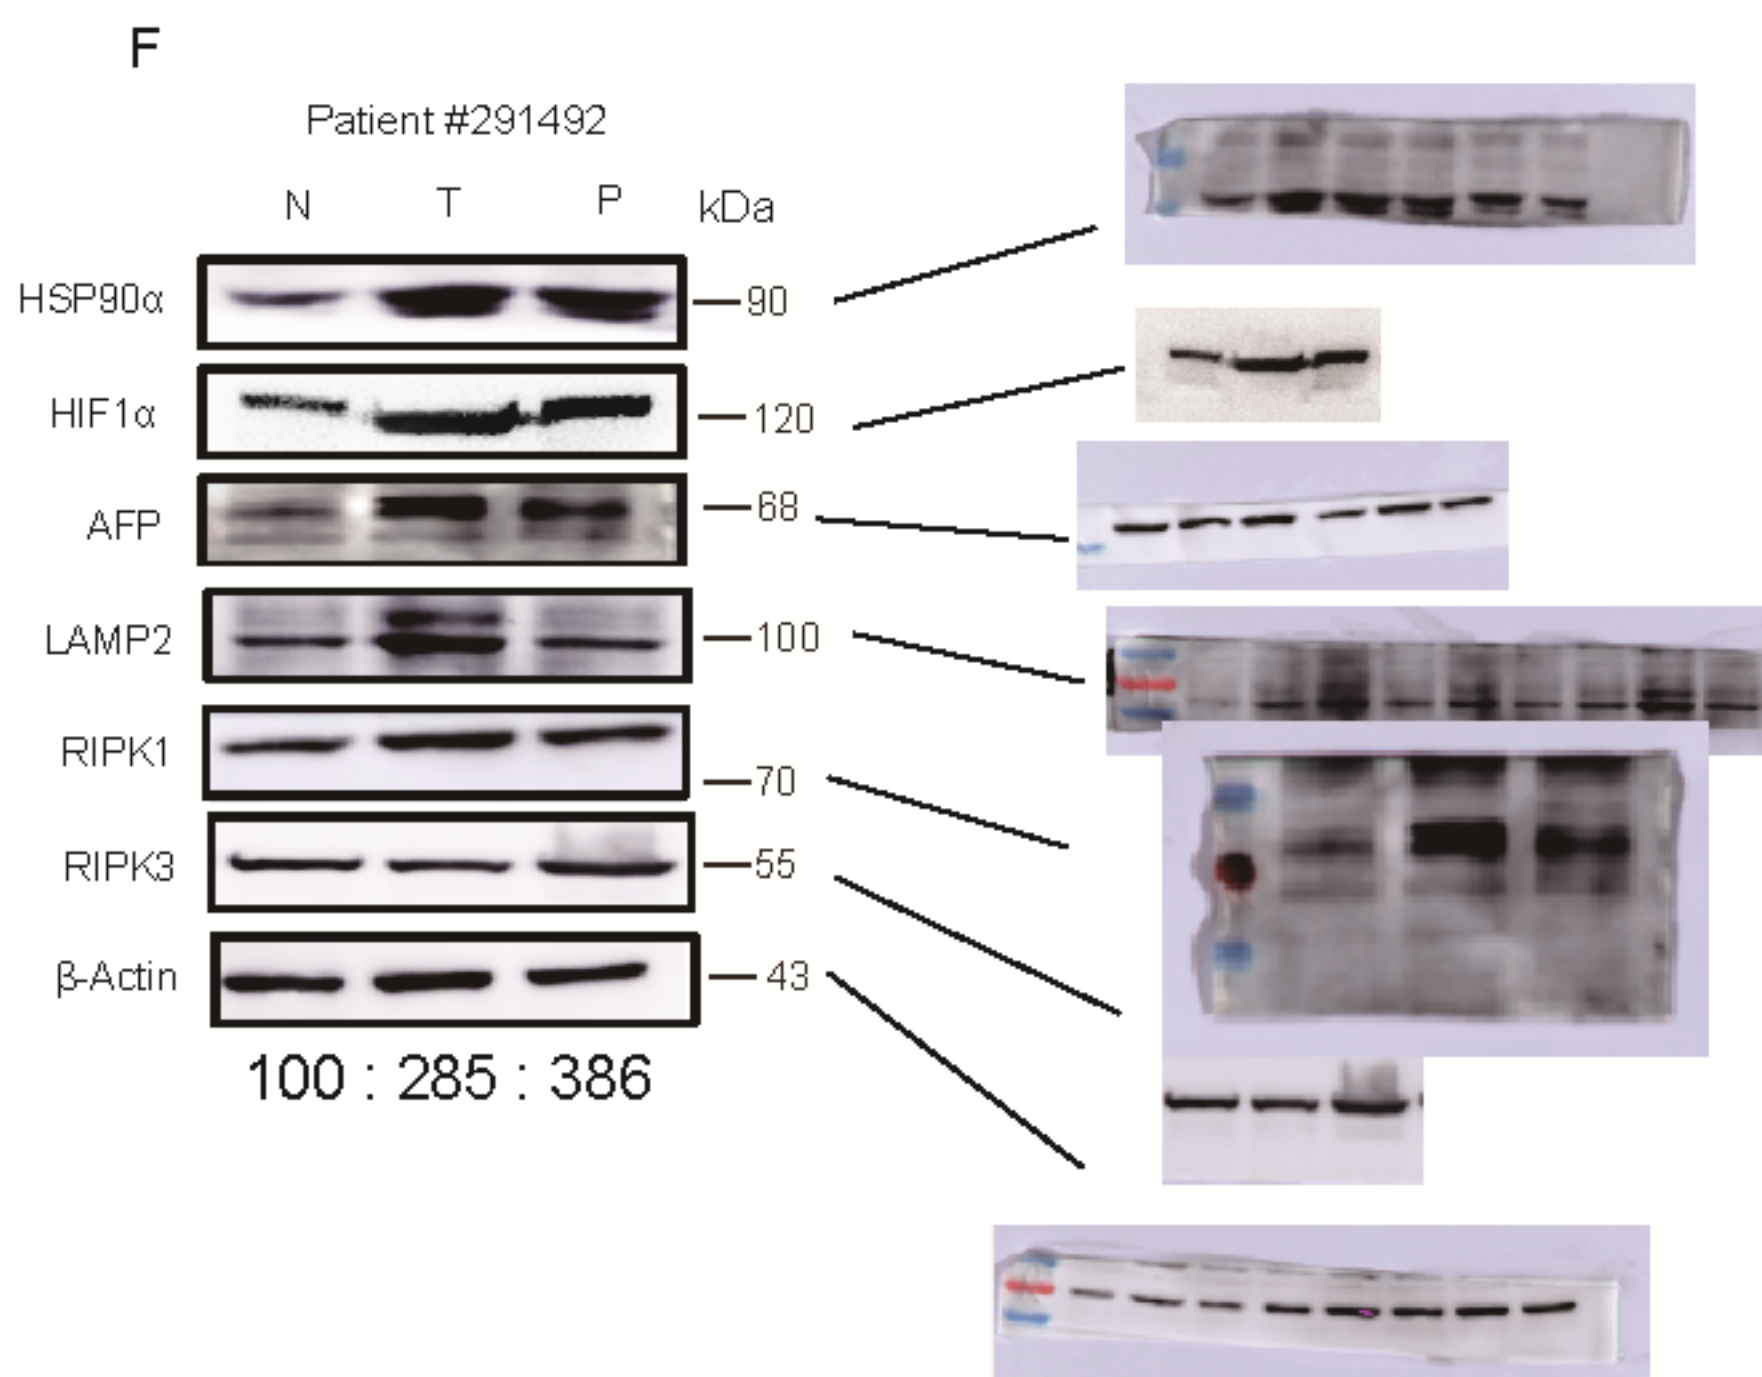

Supply 2

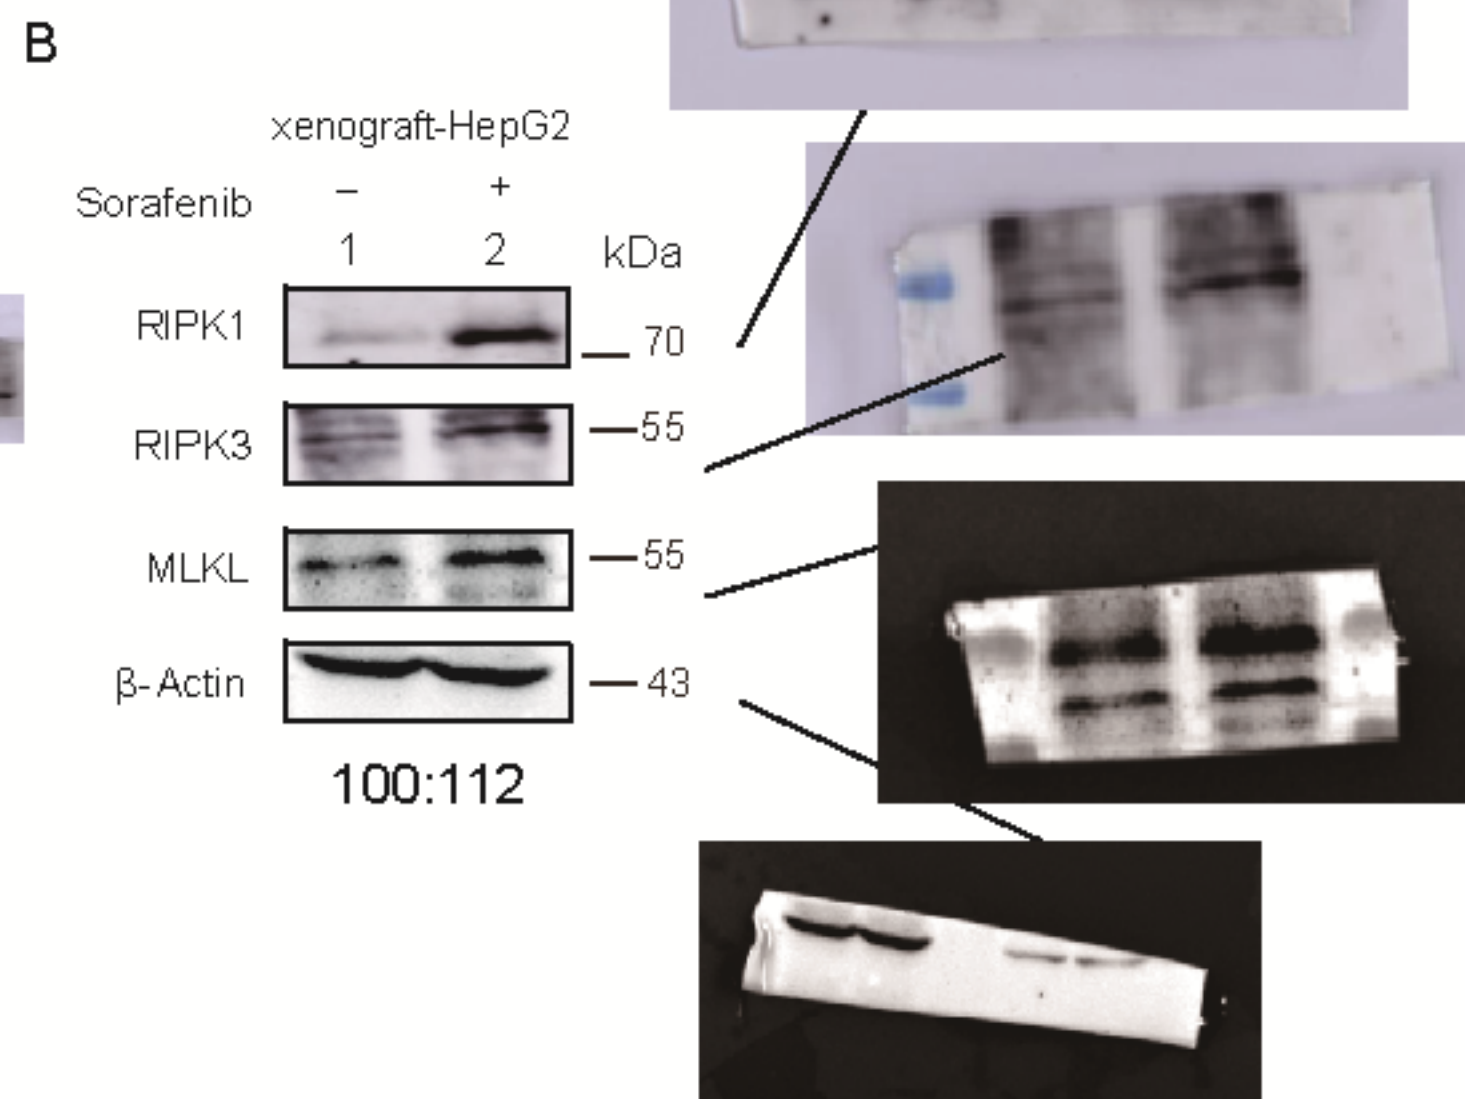

Supply 3

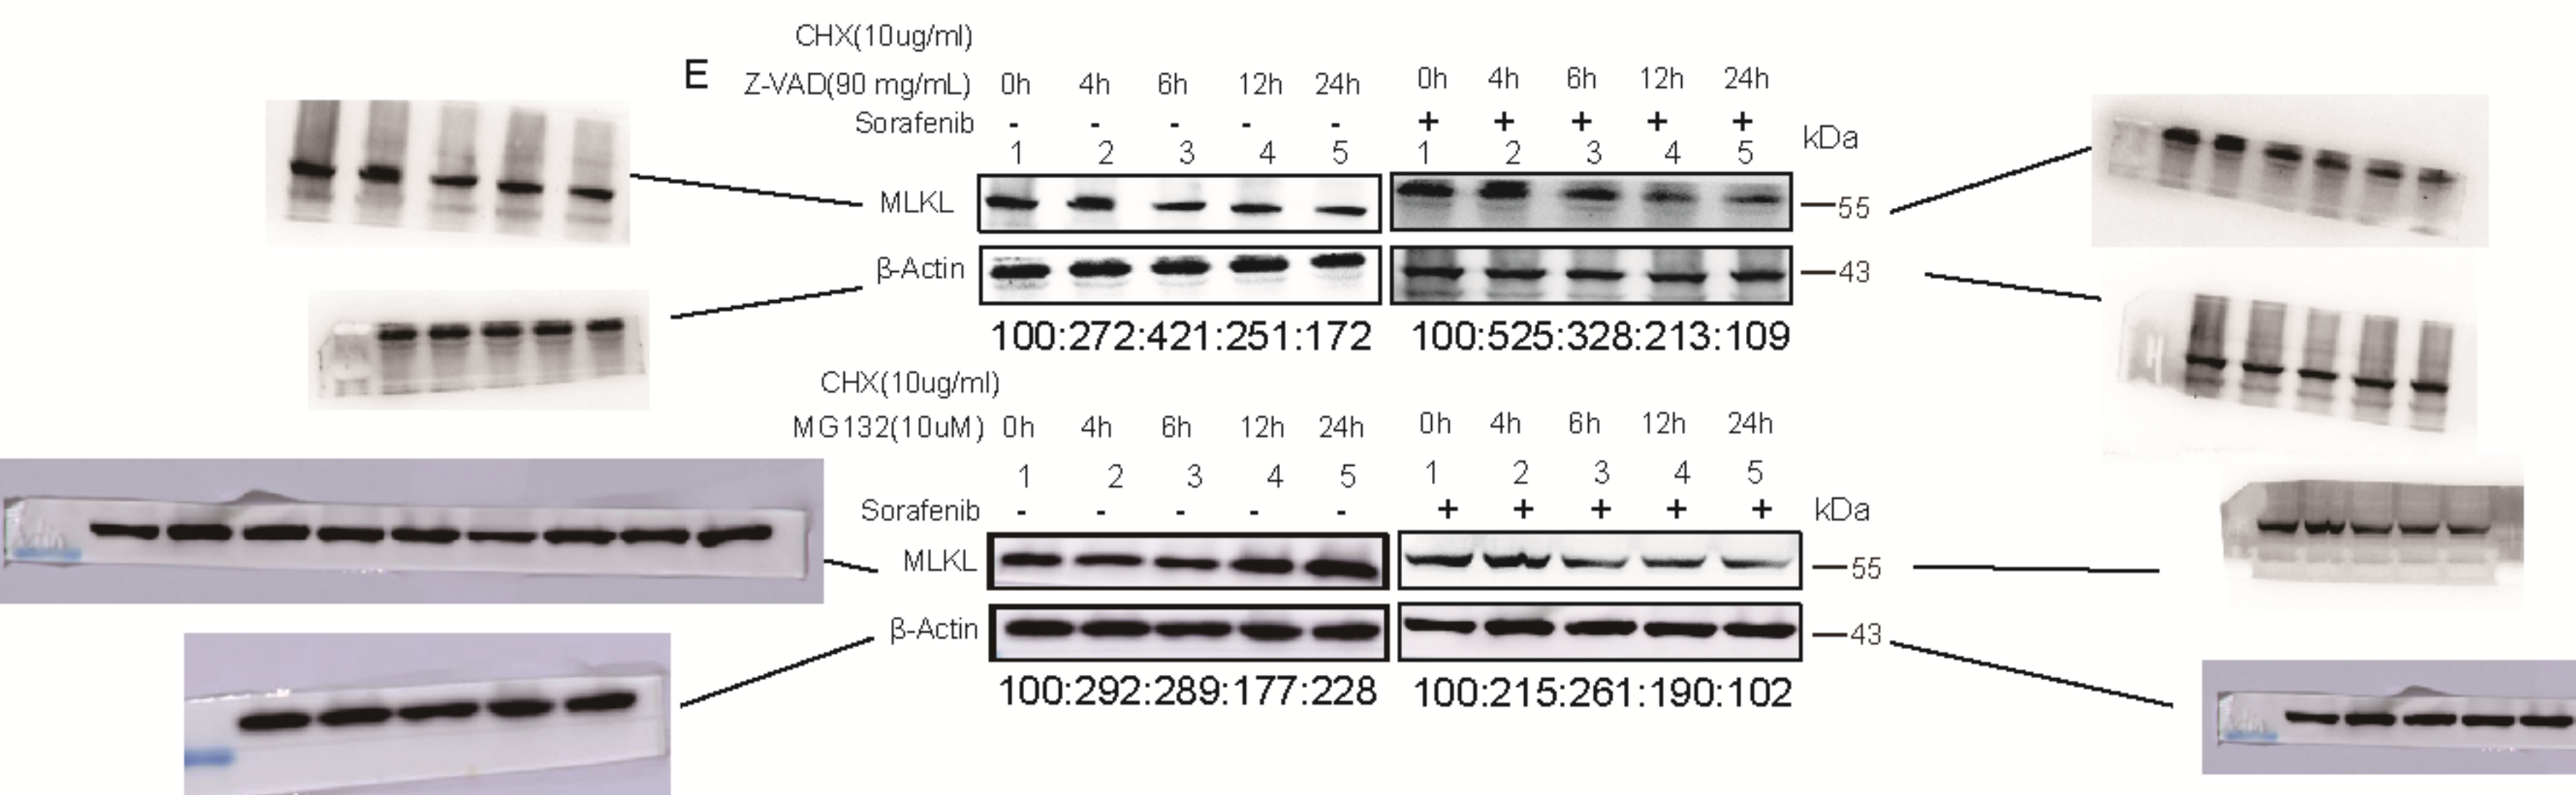

Supplement: s1 [file s1]

Figure 1

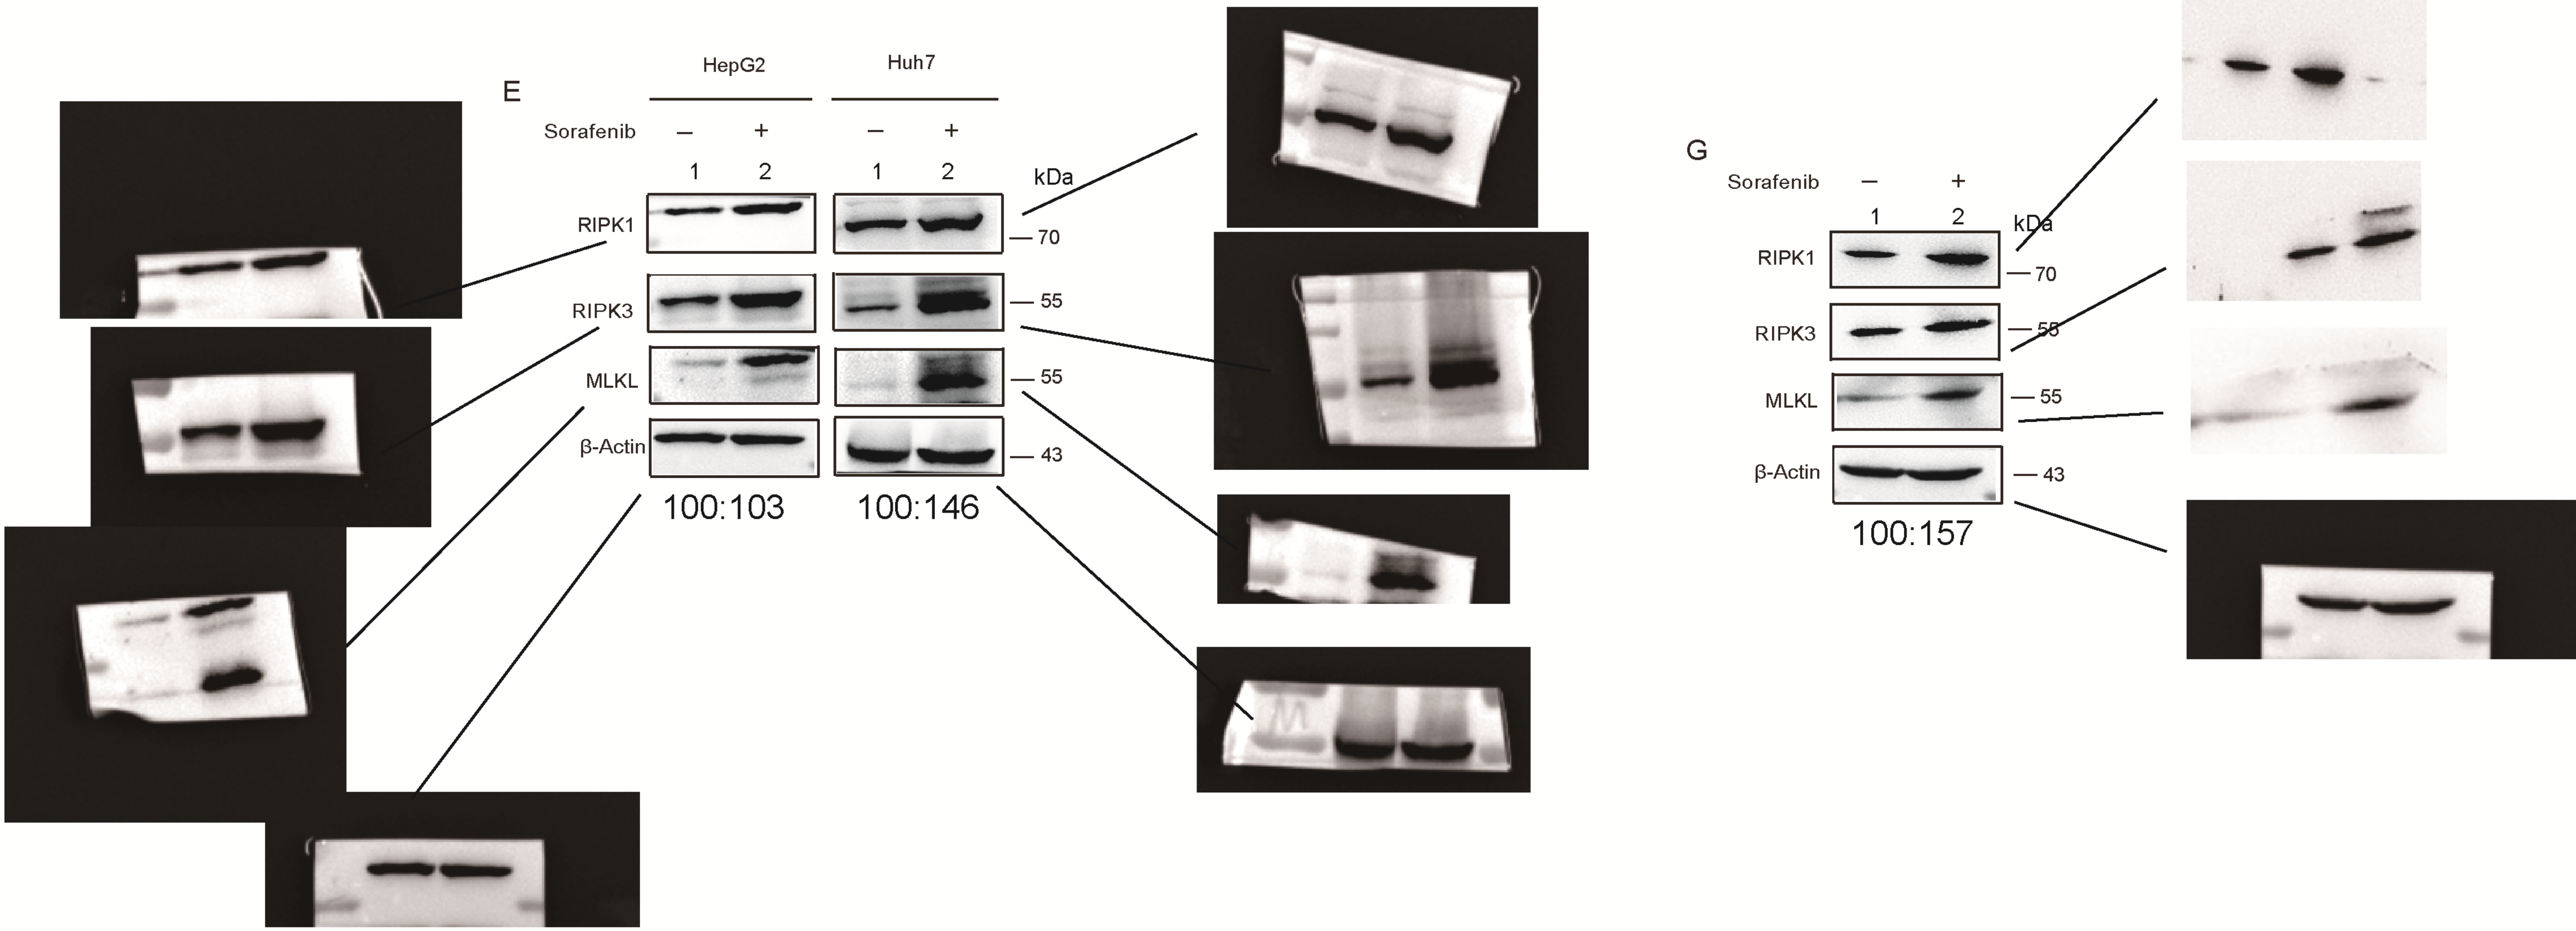

Figure 2

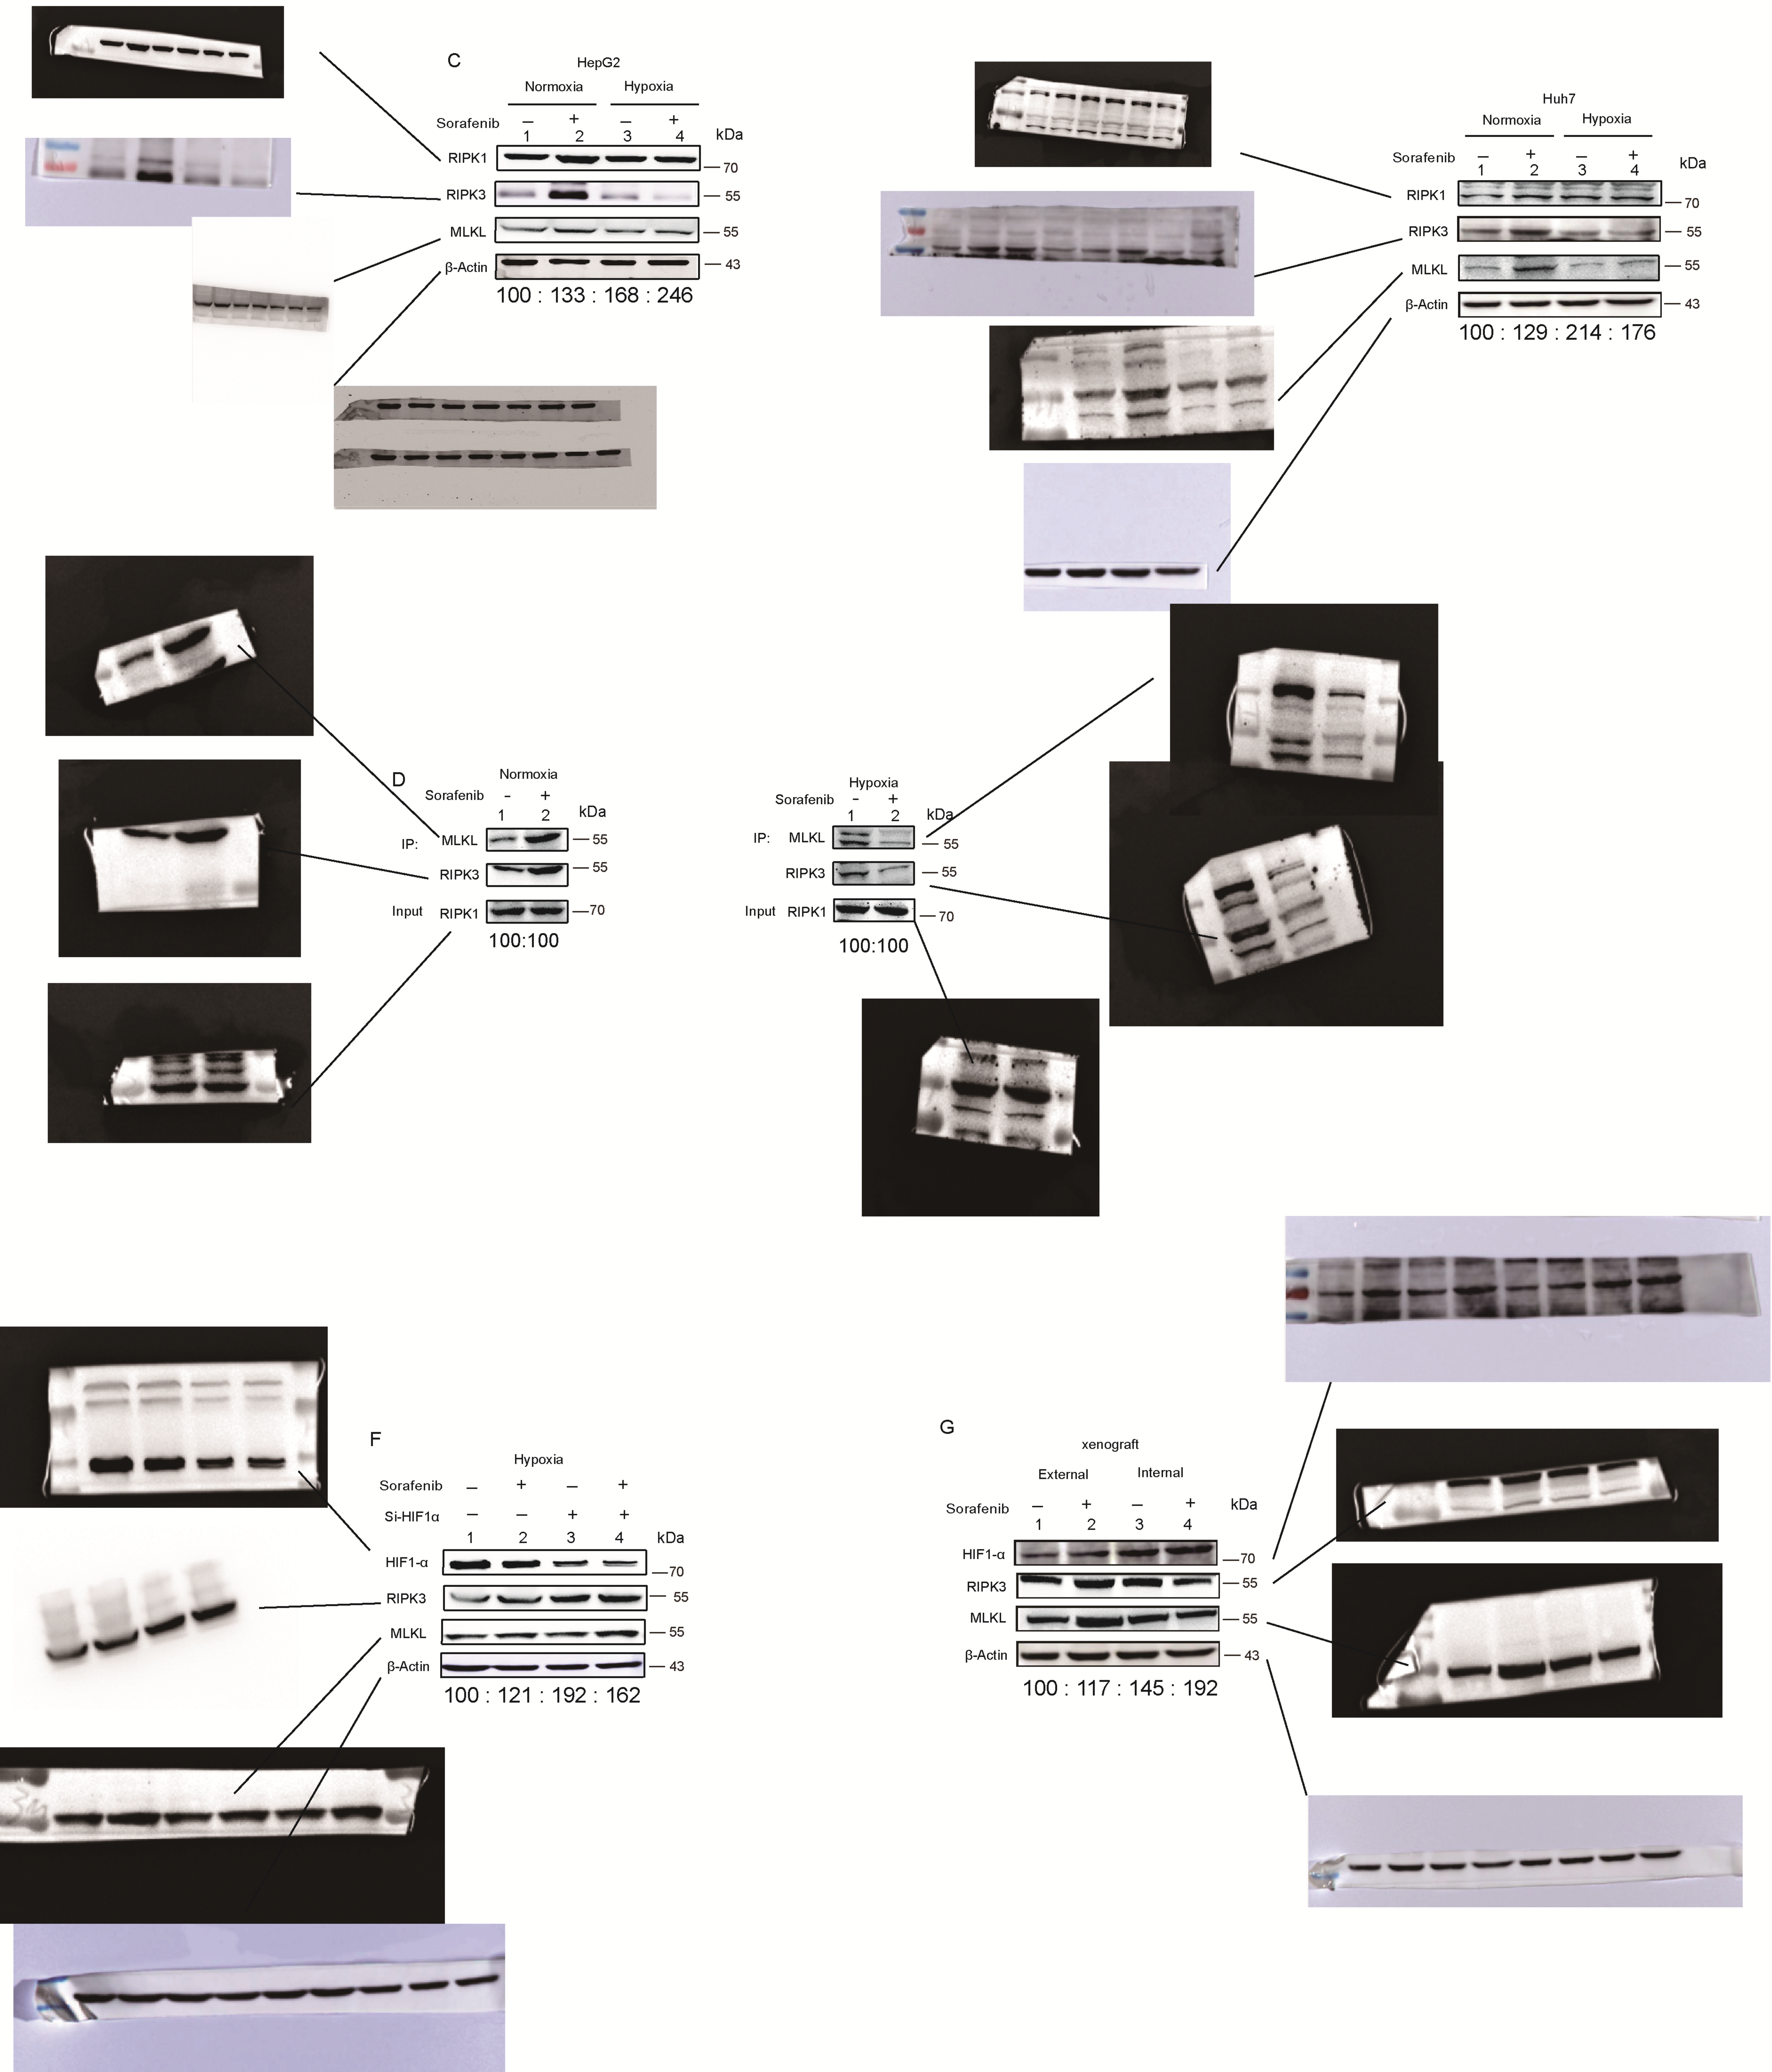

Supplement: s1 [file s1]
